# Supplementary material for: Investigating Nitrate with Other Constituents in Groundwater in Two Contrasting Tropical Highland Watersheds
Source: MDPI journal article supplement (doi:10.3390/hydrology10040082), 2023-04-03
Supplement: s1 [file s1]

## **Supplementary Materials A**

Table S1. Correlations between the proportion of land use in the buffer area around wells and the average nitrate concentration in groundwater

| Watershed<br>(Buffer radius m) | Land use            | Pearson correlation<br>coefficient |
|--------------------------------|---------------------|------------------------------------|
| Dangishta<br>(100)             | Rainfed Agriculture | 0.32*                              |
|                                | Residential         | 0.82**                             |
|                                | Grassland           | -0.38*                             |
|                                | Eucalyptus          | -0.41*                             |
| Robit Bata<br>(50)             | Rainfed Agriculture | -0.05                              |
|                                | Irrigation          | 0.06                               |
|                                | Grassland           | -0.34*                             |
|                                | Natural Forest      | -0.07                              |

Table S2. Correlations between nitrogen fertilizer applications rate in a sphere around each well and the annually averaged nitrate concentration in the well

|            |                             | <i>N per Buffer area in sphere</i> | <i>[N-NO3]</i> |
|------------|-----------------------------|------------------------------------|----------------|
| Dangishta  | N per Buffer area in sphere | 1                                  |                |
|            | [N-NO3]                     | 0.676                              | 1              |
| Robit Bata | N per Buffer area in sphere | 1                                  |                |
|            | [N-NO3]                     | -0.005                             | 1              |

Table S3. Averaged nitrate concentration over the study period and N-fertilizer input in in buffer area around groundwater wells

| Dangishta |                          |         | Robit Bata |                             |         |
|-----------|--------------------------|---------|------------|-----------------------------|---------|
| Well ID   | N per Buffer area sphere | [N-NO3] | Well ID    | N per Buffer area in sphere | [N-NO3] |
| W31       | 16.3                     | 7.6     | 1.1        | 7.0                         | 4.2     |
| W32       | 0.0                      | 2.2     | 1.2        | 0.0                         | 5.1     |
| W33       | 0.0                      | 2.2     | 1.6        | 6.8                         | 2.7     |
| W35       | 8.5                      | 3.9     | 2.1        | 0.0                         | 3.7     |
| W36       | 22.8                     | 7.1     | 2.3        | 14.5                        | 5.6     |
| W37       | 0.2                      | 2.7     | 2.4        | 8.3                         | 5.0     |
| W38       | 10.2                     | 4.8     | 2.5        | 30.5                        | 4.5     |
| W39       | 0.0                      | 4.3     | 2.6        | 0.0                         | 4.0     |
| W40       | 4.0                      | 5.9     | 3.1        | 7.1                         | 5.2     |
| W41       | 0.0                      | 3.0     | 3.2        | 0.0                         | 4.5     |
| W43       | 14.3                     | 6.7     | 3.3        | 0.0                         | 4.3     |
| W2        | 6.6                      | 5.2     | 3.4        | 8.5                         | 4.9     |
| W3        | 11.6                     | 7.3     | 3.6        | 4.0                         | 5.6     |
| W4        | 5.1                      | 8.0     | 3.8        | 4.4                         | 3.7     |
| W5        | 0.0                      | 2.5     | 4.1        | 2.4                         | 3.2     |
| W6        | 0.5                      | 2.7     | 4.3        | 13.0                        | 4.0     |
| W8        | 4.9                      | 3.6     | 4.4        | 7.3                         | 4.2     |
| W9        | 20.2                     | 9.4     | 4.5        | 13.4                        | 5.0     |
| W12       | 3.0                      | 3.0     | 4.6        | 9.7                         | 2.3     |
| W13       | 0.0                      | 2.4     | 5.2        | 7.0                         | 4.4     |
| W16       | 10.8                     | 3.0     | 7.2        | 15.0                        | 2.5     |
| W17       | 10.3                     | 2.2     | 7.3        | 13.3                        | 2.2     |
| W19       | 0.0                      | 3.9     | 7.4        | 40.9                        | 3.6     |
| W20       | 12.2                     | 4.2     | 8.1        | 11.3                        | 3.4     |
| W23       | 22.8                     | 7.0     | 9.1        | 0.0                         | 3.7     |
| W24       | 20.2                     | 4.3     | 9.4        | 36.6                        | 4.6     |
| W25       | 3.8                      | 4.5     | 9.5        | 0.0                         | 3.5     |
|           |                          |         | 11.2       | 11.4                        | 3.4     |
|           |                          |         | 11.3       | 5.7                         | 3.9     |
|           |                          |         | 11.4       | 8.6                         | 2.7     |
|           |                          |         | 12.2       | 0.0                         | 3.6     |
|           |                          |         | 12.3       | 7.6                         | 5.1     |
|           |                          |         | 12.4       | 8.0                         | 4.5     |

Table S4. Threshold concentrations for identifying redox processes in groundwater adopted from McMahon et al. (2009).

| General redox category | Predominant redox process                  | Water-chemistry criteria (mg/L) |                                |                  |                  | Comment |
|------------------------|--------------------------------------------|---------------------------------|--------------------------------|------------------|------------------|---------|
|                        |                                            | O <sub>2</sub>                  | N-NO <sub>3</sub> <sup>-</sup> | Mn <sup>2+</sup> | Fe <sup>2+</sup> |         |
| Oxic                   | O <sub>2</sub> reduction                   | ≥0.5                            | —                              | <0.05            | <0.1             |         |
| Suboxic                | —                                          | <0.5                            | <0.5                           | <0.05            | <0.1             |         |
| Anoxic                 | N-NO <sub>3</sub> <sup>-</sup> - reduction | <0.5                            | ≥0.5                           | <0.05            | <0.1             |         |
|                        | Mn (IV) reduction                          | <0.5                            | <0.5                           | ≥0.05            | <0.1             |         |
|                        | Fe(III)                                    | <0.5                            | <0.5                           | —                | ≥0.1             |         |
| Mixed                  | —                                          | —                               | —                              | —                | —                | (1)     |

<sup>1</sup>Criteria for more than one redox process are met

Table S5 Monthly and annual precipitation in Dangishta and Robit Bata watersheds from 2017 to 2018.

| Watershed  | Years | Jan. | Feb. | Mar. | Apr. | May | Jun. | Jul. | Aug. | Sep. | Oct. | Nov. | Dec. | Annual |
|------------|-------|------|------|------|------|-----|------|------|------|------|------|------|------|--------|
| Dangishta  | 2017  | 0    | 42   | 8    | 256  | 312 | 265  | 369  | 387  | 345  | 91   | 0    | 0    | 2075   |
|            | 2018  | 0    | 0    | 0    | 34   | 148 | 172  | 389  | 304  | 259  | 150  | 0    | 0    | 1456   |
| Robit Bata | 2017  | 0    | 26   | 3    | 42   | 148 | 82   | 482  | 469  | 235  | 119  | 20   | 0    | 1626   |
|            | 2018  | 0    | 0    | 18   | 0    | 64  | 194  | 360  | 288  | 164  | 46   | 11   | 0    | 1145   |

## Land Use Land Cover Map

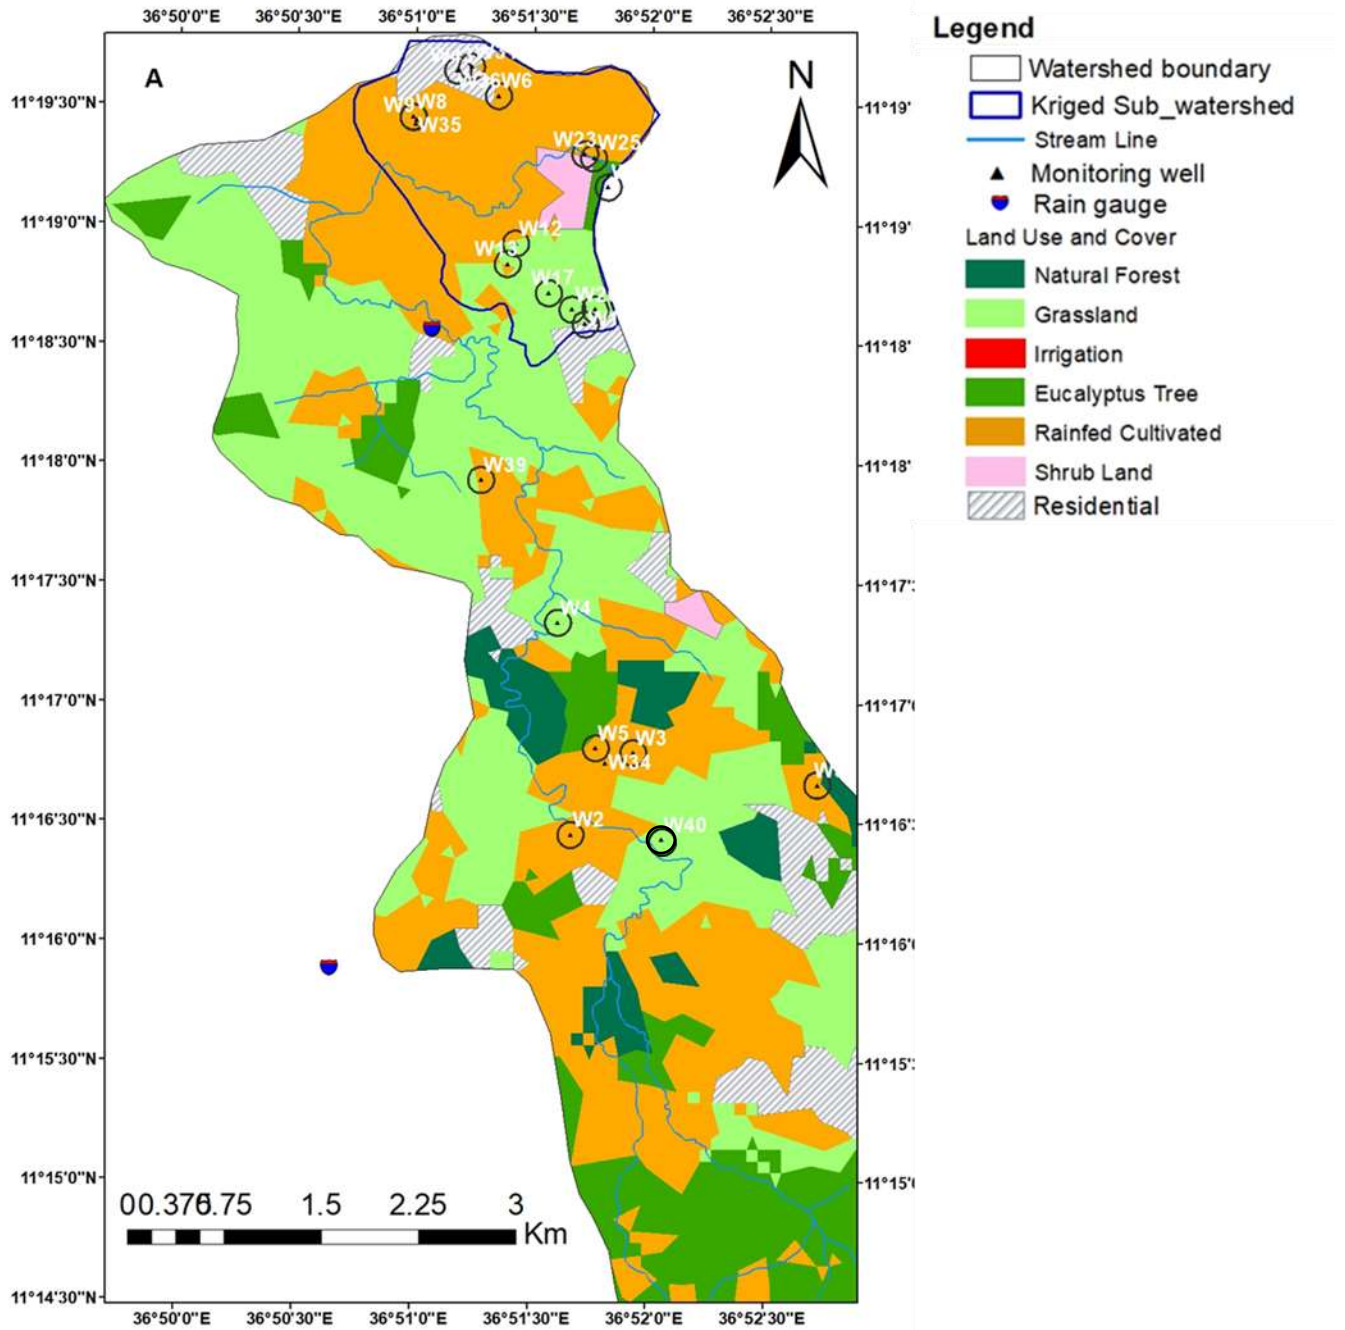

Figure S1 title on next pag

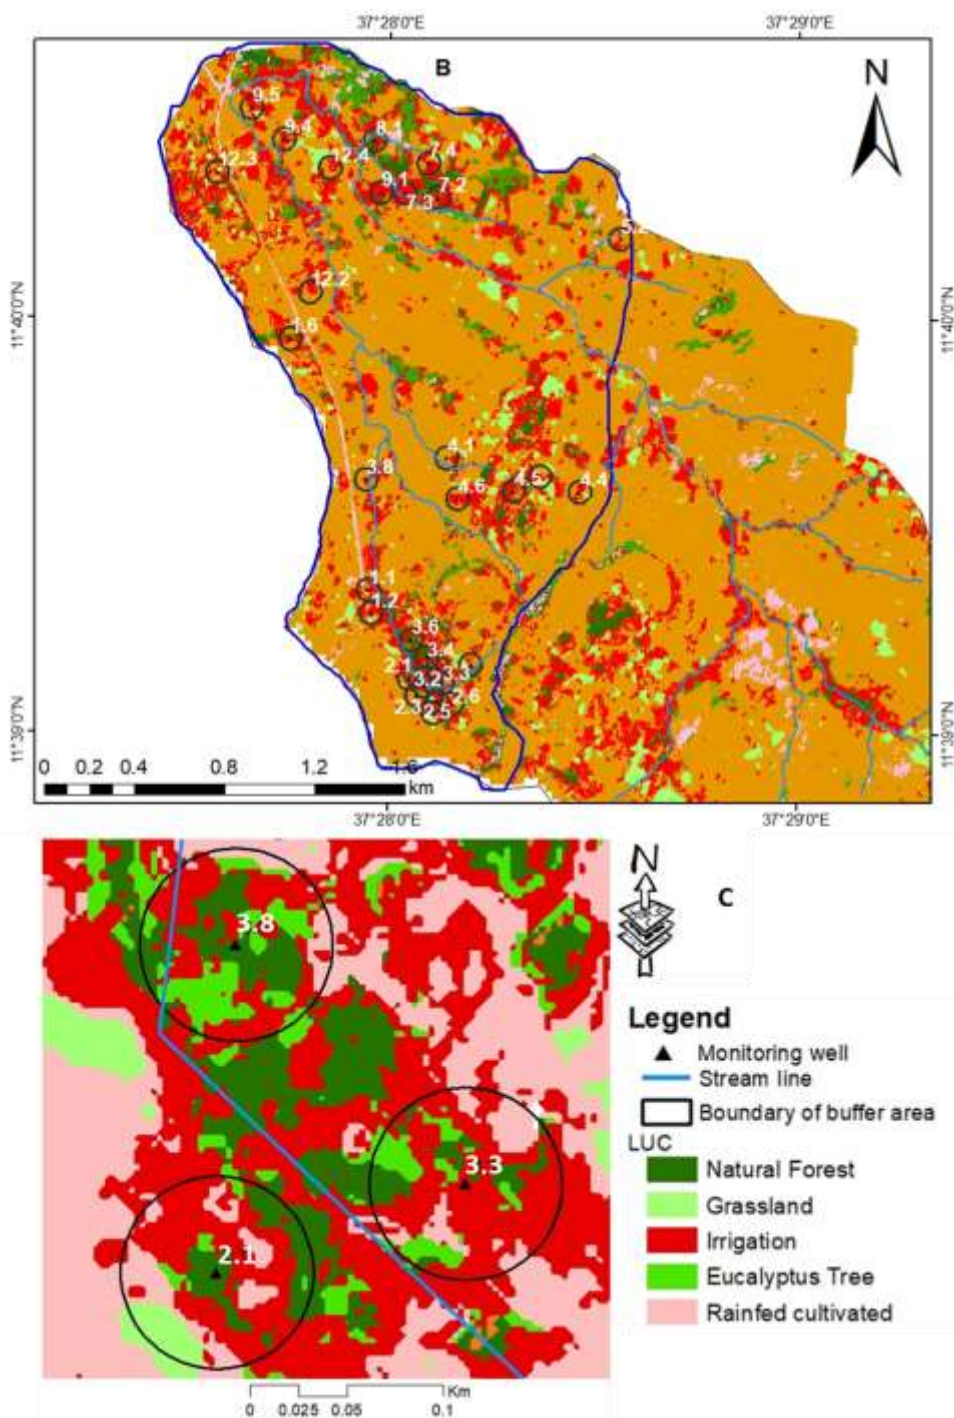

**Figure S1.** The land use maps with wells names corresponding to nomenclature in supplemental materials S2 and S3. The black triangle is the well point in the center of the delineated circle (100 m radius for Dangishta and 50 m radius for Robit Bata). The nitrogen applied to the various land uses within the sphere is regressed with the nitrate measured in the well. A) Dangishta watershed and B) Robit Bata watershed C) Detail of land-use analysis near wells for Robit Bata.

## Multiple Regression Models Assumptions Check: Normality, Equal Variance, and Linearity

**Normality:** Model residuals are normally distributed. A quantile-quantile (Q-Q plot) was used to assess whether the residuals are normally distributed (Figure S2, b). Our model residuals ( $y$ ) fit with theoretical quantiles ( $x$ ),  $y = x$ .

**Linearity:** This assumption indicates zero mean values of the residuals indicated by a red line in Figure S2 a. The residuals have a mean closer to zero for every value of the fitted values and predictors. It means that relevant variables and interactions are included in the model, and the functional form of the relationship between the predictors and the outcome is correct.

**Homoscedasticity:** This assumption implies the residuals have equal variance (homoscedasticity) for every value of the fitted values and the predictors. If the residuals have equal variance, the scale-location plot is close to the flat line, which is shown by a red line in Figure S2,c. No Outlier Effects: This assumption shows the effect of outliers, which are observations whose values greatly differ from those of other observations. Leverage is a measure of the distance between individual values of a predictor and other values of the predictor (Figure S2, d). Leverage values range from 0 to 1..

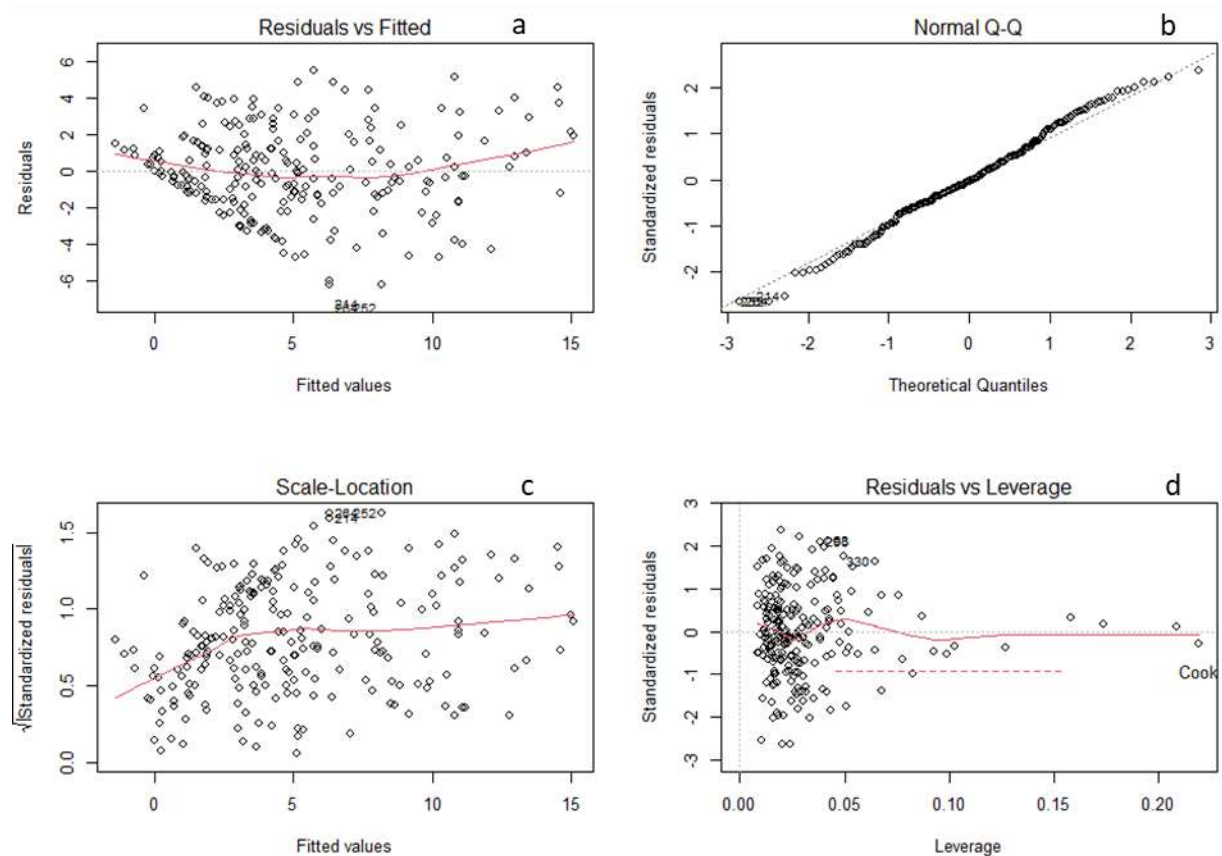

Figure S2A –Plots indicating assumption validations (i.e., linearity, normality constant variance and cook distance) for multiple linear regression model of nitrate monthly concentration in the Dangishta watershed

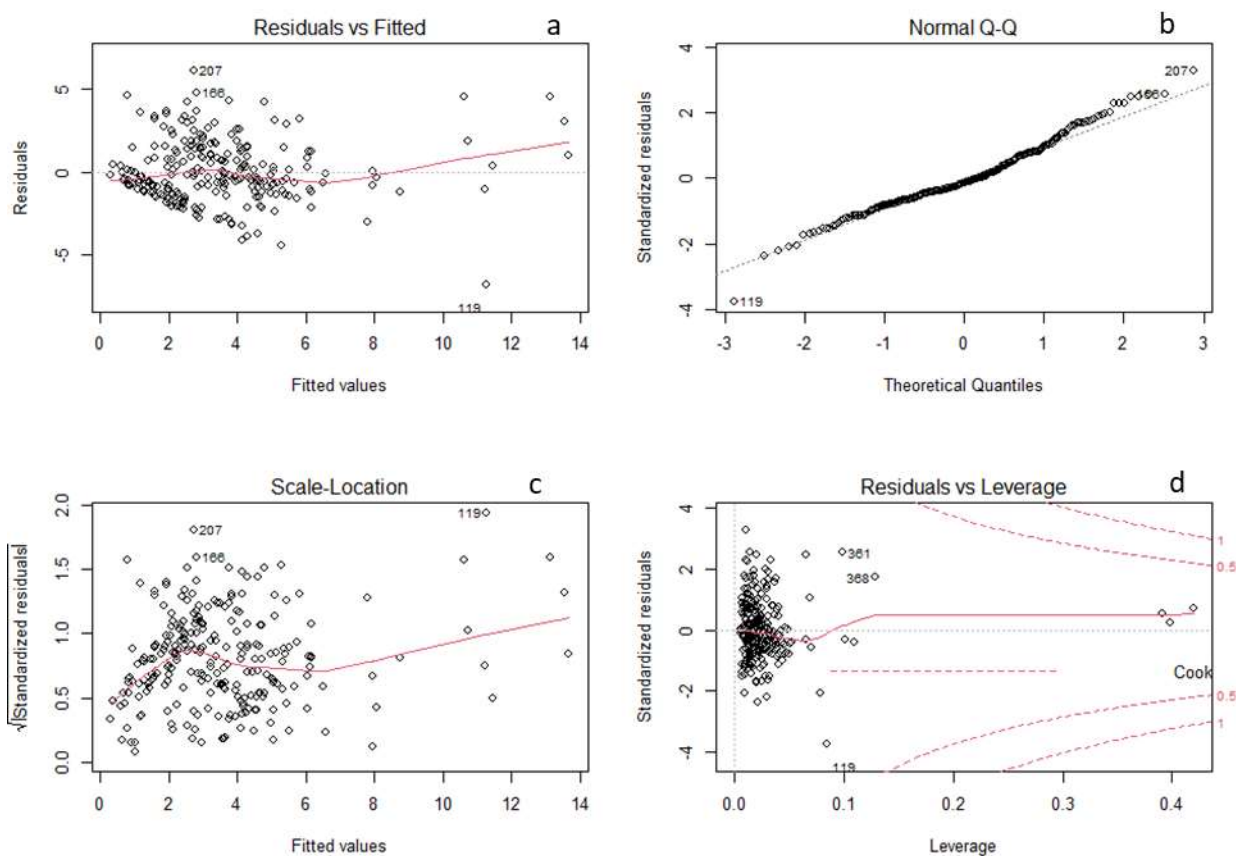

Figure S2B– A plots indicating assumption validations (i.e., linearity, normality constant variance, and cook distance) for multiple linear regression model of nitrate monthly concentration in the Dangishta watershed
